# Supplementary material
Source: PubMed Central journal article supplement (PMC7951090)
Supplement: NIHMS1615930-supplement-appendix.pdf [file NIHMS1615930-supplement-appendix.pdf]

## Appendix A. Linear Regression for Quantitative Traits

Under models (1) and (2),  $\boldsymbol{\theta} = (\boldsymbol{\beta}^\top, \gamma, \tau^2, \boldsymbol{\alpha}^\top, \sigma^2)^\top$ . We set the initial values of  $\boldsymbol{\beta}$  to  $\mathbf{0}$ ,  $\gamma$  to 0,  $\boldsymbol{\alpha}$  to  $\mathbf{0}$ ,  $\tau^2$  to the sample variance of the  $Y_i$ , and  $\sigma^2$  to the sample variance of the observed  $S_i$ .

The E-step involves calculation of  $\widehat{E}(S_i)$  and  $\widehat{E}(S_i^2)$  ( $i = 1, \dots, n$ ). If  $R_i = 1$ , then  $\widehat{E}(S_i) = S_i$  and  $\widehat{E}(S_i^2) = S_i^2$ . If  $R_i = 0$  and  $\mathcal{C}_i = (-\infty, \infty)$ , then  $\widehat{E}(S_i) = b_i$  and  $\widehat{E}(S_i^2) = b_i^2 + a_i$ , where  $a_i = (\gamma^2/\tau^2 + 1/\sigma^2)^{-1}$ , and  $b_i = a_i \{ \boldsymbol{\alpha}^\top \mathbf{X}_i / \sigma^2 + \gamma(Y_i - \boldsymbol{\beta}^\top \mathbf{Z}_i) / \tau^2 \}$ . If  $R_i = 0$  and  $\mathcal{C}_i = (-\infty, L_i)$ , then

$$\widehat{E}(S_i) = b_i - \sqrt{a_i} \frac{\phi\left(\frac{L_i - b_i}{\sqrt{a_i}}\right)}{\Phi\left(\frac{L_i - b_i}{\sqrt{a_i}}\right)},$$

and

$$\widehat{E}(S_i^2) = \{\widehat{E}(S_i)\}^2 + a_i \left[ 1 - \frac{L_i - b_i}{\sqrt{a_i}} \frac{\phi\left(\frac{L_i - b_i}{\sqrt{a_i}}\right)}{\Phi\left(\frac{L_i - b_i}{\sqrt{a_i}}\right)} - \left\{ \frac{\phi\left(\frac{L_i - b_i}{\sqrt{a_i}}\right)}{\Phi\left(\frac{L_i - b_i}{\sqrt{a_i}}\right)} \right\}^2 \right],$$

where  $\phi(x)$  and  $\Phi(x)$  are, respectively, the density and distribution functions of the standard normal random variable. If  $R_i = 0$  and  $\mathcal{C}_i = (U_i, \infty)$ , then

$$\widehat{E}(S_i) = b_i + \sqrt{a_i} \frac{\phi\left(\frac{-U_i + b_i}{\sqrt{a_i}}\right)}{\Phi\left(\frac{-U_i + b_i}{\sqrt{a_i}}\right)},$$

and

$$\widehat{E}(S_i^2) = \{\widehat{E}(S_i)\}^2 + a_i \left[ 1 - \frac{-U_i + b_i}{\sqrt{a_i}} \frac{\phi\left(\frac{-U_i + b_i}{\sqrt{a_i}}\right)}{\Phi\left(\frac{-U_i + b_i}{\sqrt{a_i}}\right)} - \left\{ \frac{\phi\left(\frac{-U_i + b_i}{\sqrt{a_i}}\right)}{\Phi\left(\frac{-U_i + b_i}{\sqrt{a_i}}\right)} \right\}^2 \right].$$

In the M-step, all parameter updates have explicit forms

$$\begin{aligned} \begin{bmatrix} \boldsymbol{\beta} \\ \gamma \end{bmatrix} &= \left( \sum_{i=1}^n \begin{bmatrix} \mathbf{Z}_i \mathbf{Z}_i^\top & \widehat{E}(S_i) \mathbf{Z}_i \\ \widehat{E}(S_i) \mathbf{Z}_i^\top & \widehat{E}(S_i^2) \end{bmatrix} \right)^{-1} \sum_{i=1}^n \begin{bmatrix} Y_i \mathbf{Z}_i \\ Y_i \widehat{E}(S_i) \end{bmatrix}, \\ \tau^2 &= n^{-1} \sum_{i=1}^n \left\{ (Y_i - \boldsymbol{\beta}^\top \mathbf{Z}_i)^2 + \gamma^2 \widehat{E}(S_i^2) - 2(Y_i - \boldsymbol{\beta}^\top \mathbf{Z}_i) \gamma \widehat{E}(S_i) \right\}, \\ \boldsymbol{\alpha} &= \left( \sum_{i=1}^n \mathbf{X}_i \mathbf{X}_i^\top \right)^{-1} \sum_{i=1}^n \widehat{E}(S_i) \mathbf{X}_i, \end{aligned}$$

and

$$\sigma^2 = n^{-1} \sum_{i=1}^n \left\{ \widehat{E}(S_i^2) + (\boldsymbol{\alpha}^\top \mathbf{X}_i)^2 - 2(\boldsymbol{\alpha}^\top \mathbf{X}_i) \widehat{E}(S_i) \right\}.$$

Denote the final estimate of  $\boldsymbol{\theta}$  as  $\widehat{\boldsymbol{\theta}} = (\widehat{\boldsymbol{\beta}}^\top, \widehat{\gamma}, \widehat{\tau}^2, \widehat{\boldsymbol{\alpha}}^\top, \widehat{\sigma}^2)^\top$ .

It is straightforward to show that

$$\mathbf{Q} = \begin{bmatrix} \sum_{i=1}^n \mathbf{Z}_i \mathbf{Z}_i^\top / \widehat{\tau}^2 & \sum_{i=1}^n \widehat{E}(S_i) \mathbf{Z}_i / \widehat{\tau}^2 & \mathbf{0} & \mathbf{0} & \mathbf{0} \\ \sum_{i=1}^n \widehat{E}(S_i) \mathbf{Z}_i^\top / \widehat{\tau}^2 & \sum_{i=1}^n \widehat{E}(S_i^2) / \widehat{\tau}^2 & 0 & \mathbf{0}^\top & 0 \\ \mathbf{0}^\top & 0 & n / (2\widehat{\tau}^4) & \mathbf{0}^\top & 0 \\ \mathbf{0} & \mathbf{0} & \mathbf{0} & \sum_{i=1}^n \mathbf{X}_i \mathbf{X}_i^\top / \widehat{\sigma}^2 & \mathbf{0} \\ \mathbf{0}^\top & 0 & 0 & \mathbf{0}^\top & n / (2\widehat{\sigma}^4) \end{bmatrix}.$$

If  $S_i$  is missing, we compute

$$\mu_{1i} = b_i, \quad \mu_{2i} = b_i^2 + a_i, \quad \mu_{3i} = 3a_i b_i + b_i^3, \quad \mu_{4i} = 3a_i^2 + 6a_i b_i^2 + b_i^4.$$

If  $S_i$  is subject to a lower detection limit, we start with

$$f_{0i} = 1, \quad f_{1i} = -\frac{\phi((L_i - b_i)/\sqrt{a_i})}{\Phi((L_i - b_i)/\sqrt{a_i})}.$$

We recursively compute

$$f_{ji} = -\frac{\{(L_i - b_i)/\sqrt{a_i}\}^{j-1} \phi((L_i - b_i)/\sqrt{a_i})}{\Phi((L_i - b_i)/\sqrt{a_i})} + (j-1)f_{j-2,i}, \quad j = 2, 3, 4.$$

We then compute

$$\mu_{ki} = \sum_{j=0}^k \binom{k}{j} a_i^{j/2} b_i^{k-j} f_{ji}$$

for  $k = 1, 2, 3, 4$ . If  $S_i$  is subject to an upper detection limit, we set

$$f_{0i} = 1, \quad f_{1i} = -\frac{\phi((-U_i + b_i)/\sqrt{a_i})}{\Phi((-U_i + b_i)/\sqrt{a_i})}.$$

We recursively compute

$$f_{ji} = -\frac{\{(-U_i + b_i)/\sqrt{a_i}\}^{j-1} \phi((-U_i + b_i)/\sqrt{a_i})}{\Phi((-U_i + b_i)/\sqrt{a_i})} + (j-1)f_{j-2,i}, \quad j = 2, 3, 4.$$

We then compute

$$\mu_{ki} = (-1)^k \sum_{j=0}^k \binom{k}{j} a_i^{j/2} (-b_i)^{k-j} f_{ji}$$

for  $k = 1, 2, 3, 4$ .

It can be shown that

$$\mathbf{U}_i(S_i) = \mathbf{V}_i \begin{bmatrix} 1 \\ S_i \\ S_i^2 \end{bmatrix},$$

where

$$\mathbf{V}_i = \begin{bmatrix} (Y_i - \hat{\boldsymbol{\beta}}^T \mathbf{Z}_i) \mathbf{Z}_i / \hat{\tau}^2 & -\hat{\gamma} \mathbf{Z}_i / \hat{\tau}^2 & \mathbf{0} \\ 0 & (Y_i - \hat{\boldsymbol{\beta}}^T \mathbf{Z}_i) / \hat{\tau}^2 & -\hat{\gamma} / \hat{\tau}^2 \\ -1/(2\hat{\tau}^2) + (Y_i - \hat{\boldsymbol{\beta}}^T \mathbf{Z}_i)^2 / (2\hat{\tau}^4) & -\hat{\gamma}(Y_i - \hat{\boldsymbol{\beta}}^T \mathbf{Z}_i) / \hat{\tau}^4 & \hat{\gamma}^2 / (2\hat{\tau}^4) \\ -(\hat{\boldsymbol{\alpha}}^T \mathbf{X}_i) \mathbf{X}_i / \hat{\sigma}^2 & \mathbf{X}_i / \hat{\sigma}^2 & \mathbf{0} \\ -1/(2\hat{\sigma}^2) + (\hat{\boldsymbol{\alpha}}^T \mathbf{X}_i)^2 / (2\hat{\sigma}^4) & -\hat{\boldsymbol{\alpha}}^T \mathbf{X}_i / \hat{\sigma}^4 & 1/(2\hat{\sigma}^4) \end{bmatrix}.$$

Thus,

$$\hat{E}\{\mathbf{U}_i(S_i)\} = \mathbf{V}_i \begin{bmatrix} 1 \\ \mu_{1i} \\ \mu_{2i} \end{bmatrix},$$

and

$$\hat{E}\{\mathbf{U}_i(S_i) \mathbf{U}_i(S_i)^T\} = \mathbf{V}_i \begin{bmatrix} 1 & \mu_{1i} & \mu_{2i} \\ \mu_{1i} & \mu_{2i} & \mu_{3i} \\ \mu_{2i} & \mu_{3i} & \mu_{4i} \end{bmatrix} \mathbf{V}_i^T.$$

## Appendix B. Logistic Regression for Binary Traits

Under models (1) and (3),  $\boldsymbol{\theta} = (\boldsymbol{\beta}^T, \gamma, \boldsymbol{\alpha}^T, \sigma^2)^T$ . We set the initial values of  $\boldsymbol{\beta}$  to  $\mathbf{0}$ ,  $\gamma$  to 0,  $\boldsymbol{\alpha}$  to  $\mathbf{0}$ , and  $\sigma^2$  to the sample variance of the observed  $S_i$ .

In the E-step, we consider the following functions

$$\begin{aligned} g_1(S_i) &= S_i, & g_2(S_i) &= S_i^2, \\ g_3(S_i) &= \frac{\exp(\boldsymbol{\beta}^T \mathbf{Z}_i + \gamma S_i)}{1 + \exp(\boldsymbol{\beta}^T \mathbf{Z}_i + \gamma S_i)}, \\ g_4(S_i) &= \frac{S_i \exp(\boldsymbol{\beta}^T \mathbf{Z}_i + \gamma S_i)}{1 + \exp(\boldsymbol{\beta}^T \mathbf{Z}_i + \gamma S_i)}, \\ g_5(S_i) &= \frac{\exp(\boldsymbol{\beta}^T \mathbf{Z}_i + \gamma S_i)}{\{1 + \exp(\boldsymbol{\beta}^T \mathbf{Z}_i + \gamma S_i)\}^2}, \\ g_6(S_i) &= \frac{S_i \exp(\boldsymbol{\beta}^T \mathbf{Z}_i + \gamma S_i)}{\{1 + \exp(\boldsymbol{\beta}^T \mathbf{Z}_i + \gamma S_i)\}^2}, \end{aligned}$$

and

$$g_7(S_i) = \frac{S_i^2 \exp(\boldsymbol{\beta}^T \mathbf{Z}_i + \gamma S_i)}{\{1 + \exp(\boldsymbol{\beta}^T \mathbf{Z}_i + \gamma S_i)\}^2}.$$

For  $k = 1, \dots, 7$ , let  $\widehat{E}\{g_k(S_i)\} = g_k(S_i)$  for  $R_i = 1$  and calculate  $\widehat{E}\{g_k(S_i)\}$  for  $R_i = 0$  using the numerical integration given at the end of this appendix. In the M-step,

$$\begin{bmatrix} \boldsymbol{\beta}^{\text{new}} \\ \gamma^{\text{new}} \end{bmatrix} = \begin{bmatrix} \boldsymbol{\beta}^{\text{old}} \\ \gamma^{\text{old}} \end{bmatrix} + \left( \sum_{i=1}^n \begin{bmatrix} \widehat{E}\{g_5(S_i)\} \mathbf{Z}_i \mathbf{Z}_i^{\text{T}} & \widehat{E}\{g_6(S_i)\} \mathbf{Z}_i \\ \widehat{E}\{g_6(S_i)\} \mathbf{Z}_i^{\text{T}} & \widehat{E}\{g_7(S_i)\} \end{bmatrix} \right)^{-1} \sum_{i=1}^n \begin{bmatrix} [Y_i - \widehat{E}\{g_3(S_i)\}] \mathbf{Z}_i \\ Y_i \widehat{E}(S_i) - \widehat{E}\{g_4(S_i)\} \end{bmatrix},$$

$$\boldsymbol{\alpha} = \left( \sum_{i=1}^n \mathbf{X}_i \mathbf{X}_i^{\text{T}} \right)^{-1} \sum_{i=1}^n \widehat{E}(S_i) \mathbf{X}_i,$$

and

$$\sigma^2 = n^{-1} \sum_{i=1}^n \left\{ \widehat{E}(S_i^2) + (\boldsymbol{\alpha}^{\text{T}} \mathbf{X}_i)^2 - 2(\boldsymbol{\alpha}^{\text{T}} \mathbf{X}_i) \widehat{E}(S_i) \right\}.$$

Denote the final estimate of  $\boldsymbol{\theta}$  as  $\widehat{\boldsymbol{\theta}} = (\widehat{\boldsymbol{\beta}}^{\text{T}}, \widehat{\gamma}, \widehat{\boldsymbol{\alpha}}^{\text{T}}, \widehat{\sigma}^2)^{\text{T}}$ .

It can be shown that

$$\mathbf{Q} = \begin{bmatrix} \sum_{i=1}^n \widehat{E}\{g_5(S_i)\} \mathbf{Z}_i \mathbf{Z}_i^{\text{T}} & \sum_{i=1}^n \widehat{E}\{g_6(S_i)\} \mathbf{Z}_i & \mathbf{0} & \mathbf{0} \\ \sum_{i=1}^n \widehat{E}\{g_6(S_i)\} \mathbf{Z}_i^{\text{T}} & \sum_{i=1}^n \widehat{E}\{g_7(S_i)\} & \mathbf{0}^{\text{T}} & 0 \\ \mathbf{0} & \mathbf{0} & \sum_{i=1}^n \mathbf{X}_i \mathbf{X}_i^{\text{T}} / \widehat{\sigma}^2 & \mathbf{0} \\ \mathbf{0}^{\text{T}} & 0 & \mathbf{0}^{\text{T}} & n / (2\widehat{\sigma}^4) \end{bmatrix}.$$

In addition,

$$\mathbf{U}_i(S_i) = \mathbf{V}_i \begin{bmatrix} 1 \\ S_i \\ S_i^2 \\ \exp(\widehat{\boldsymbol{\beta}}^{\text{T}} \mathbf{Z}_i + \widehat{\gamma} S_i) / \{1 + \exp(\widehat{\boldsymbol{\beta}}^{\text{T}} \mathbf{Z}_i + \widehat{\gamma} S_i)\} \\ S_i \exp(\widehat{\boldsymbol{\beta}}^{\text{T}} \mathbf{Z}_i + \widehat{\gamma} S_i) / \{1 + \exp(\widehat{\boldsymbol{\beta}}^{\text{T}} \mathbf{Z}_i + \widehat{\gamma} S_i)\} \end{bmatrix},$$

where

$$\mathbf{V}_i = \begin{bmatrix} Y_i \mathbf{Z}_i & \mathbf{0} & \mathbf{0} & -\mathbf{Z}_i & \mathbf{0} \\ 0 & Y_i & 0 & 0 & -1 \\ -(\widehat{\boldsymbol{\alpha}}^{\text{T}} \mathbf{X}_i) \mathbf{X}_i / \widehat{\sigma}^2 & \mathbf{X}_i / \widehat{\sigma}^2 & \mathbf{0} & \mathbf{0} & \mathbf{0} \\ -1 / (2\widehat{\sigma}^2) + (\widehat{\boldsymbol{\alpha}}^{\text{T}} \mathbf{X}_i)^2 / (2\widehat{\sigma}^4) & -\widehat{\boldsymbol{\alpha}}^{\text{T}} \mathbf{X}_i / \widehat{\sigma}^4 & 1 / (2\widehat{\sigma}^4) & 0 & 0 \end{bmatrix}.$$

Thus,

$$\widehat{E}\{\mathbf{U}_i(S_i)\} = \mathbf{V}_i \begin{bmatrix} 1 \\ \widehat{E}(S_i) \\ \widehat{E}(S_i^2) \\ \widehat{E}\{g_3(S_i)\} \\ \widehat{E}\{g_4(S_i)\} \end{bmatrix},$$

and

$$\widehat{E}\{\mathbf{U}_i(S_i)\mathbf{U}_i(S_i)^\top\} = \mathbf{V}_i \begin{bmatrix} 1 & \widehat{E}(S_i) & \widehat{E}(S_i^2) & \widehat{E}\{g_3(S_i)\} & \widehat{E}\{g_4(S_i)\} \\ \widehat{E}(S_i) & \widehat{E}(S_i^2) & \widehat{E}(S_i^3) & \widehat{E}\{g_4(S_i)\} & \widehat{E}\{S_i^2 g_3(S_i)\} \\ \widehat{E}(S_i^2) & \widehat{E}(S_i^3) & \widehat{E}(S_i^4) & \widehat{E}\{S_i^2 g_3(S_i)\} & \widehat{E}\{S_i^3 g_3(S_i)\} \\ \widehat{E}\{g_3(S_i)\} & \widehat{E}\{g_4(S_i)\} & \widehat{E}\{S_i^2 g_3(S_i)\} & \widehat{E}\{g_3^2(S_i)\} & \widehat{E}\{S_i g_3^2(S_i)\} \\ \widehat{E}\{g_4(S_i)\} & \widehat{E}\{S_i^2 g_3(S_i)\} & \widehat{E}\{S_i^3 g_3(S_i)\} & \widehat{E}\{S_i g_3^2(S_i)\} & \widehat{E}\{S_i^2 g_3^2(S_i)\} \end{bmatrix} \mathbf{V}_i^\top.$$

To calculate  $\widehat{E}\{g(S_i)\}$ , we use the Gaussian-Hermite approximation

$$\int_{-\infty}^{\infty} h(x)e^{-x^2} dx \approx \sum_{k=1}^K w_k h(x_k),$$

where  $(w_k, x_k)$  ( $k = 1, \dots, K$ ) are the weights and abacissi. Note that the posterior density of  $S_i$  given the observed data is proportional to  $\exp\{-(s - b_i)^2/(2a_i)\}d_i(s)I(s \in \mathcal{C}_i)$ , where  $a_i = \sigma^2$ ,  $b_i = \boldsymbol{\alpha}^\top \mathbf{X}_i$ , and  $d_i(s) = \exp\{Y_i(\boldsymbol{\beta}^\top \mathbf{Z}_i + \gamma s)\}/\{1 + \exp(\boldsymbol{\beta}^\top \mathbf{Z}_i + \gamma s)\}$ . Thus, in the case of a lower detection limit,

$$\begin{aligned} \widehat{E}\{g(S_i)\} &= \frac{\int_{-\infty}^{L_i} g(s)d_i(s) \exp\{-(s - b_i)^2/(2a_i)\}ds}{\int_{-\infty}^{L_i} d_i(s) \exp\{-(s - b_i)^2/(2a_i)\}ds} \\ &= \frac{\int_{-\infty}^{c_i} g(\sqrt{2a_i}s + b_i)d_i(\sqrt{a_i}s + b_i)e^{-s^2} ds}{\int_{-\infty}^{c_i} d_i(\sqrt{a_i}s + b_i)e^{-s^2} ds}, \end{aligned}$$

where  $c_i = (L_i - b_i)/\sqrt{2a_i}$ . Clearly,

$$\begin{aligned} &\int_{-\infty}^{c_i} g(\sqrt{2a_i}s + b_i)d_i(\sqrt{a_i}s + b_i)e^{-s^2} ds \\ &= \int_{-\infty}^0 g(\sqrt{2a_i}s + \sqrt{2a_i}c_i + b_i)d_i(\sqrt{2a_i}s + \sqrt{2a_i}c_i + b_i)e^{-2c_i s - c_i^2} e^{-s^2} ds \\ &= \int_{-\infty}^{\infty} \tilde{g}_i(s)e^{-s^2} ds, \end{aligned}$$

where

$$\begin{aligned} \tilde{g}_i(s) &= \left\{ g(\sqrt{2a_i}s + \sqrt{2a_i}c_i + b_i)d_i(\sqrt{2a_i}s + \sqrt{2a_i}c_i + b_i)e^{-2c_i s - c_i^2} I(s \leq 0) \right. \\ &\quad \left. + g(-\sqrt{2a_i}s + \sqrt{2a_i}c_i + b_i)d_i(-\sqrt{2a_i}s + \sqrt{2a_i}c_i + b_i)e^{2c_i s - c_i^2} I(s > 0) \right\} / 2. \end{aligned}$$

Then

$$\widehat{E}\{g(S_i)\} \approx \frac{\sum_{k=1}^K \tilde{g}_i(x_k)w_k}{\sum_{k=1}^K \tilde{d}_i(x_k)w_k},$$

where

$$\tilde{d}_i(s) = \left\{ d_i(\sqrt{2a_i}s + \sqrt{2a_i}c_i + b_i)e^{-2c_i s - c_i^2} I(s \leq 0) + d_i(-\sqrt{2a_i}s + \sqrt{2a_i}c_i + b_i)e^{2c_i s - c_i^2} I(s > 0) \right\} / 2.$$

If  $S_i$  is subject to an upper limit, then we set  $c_i = (-U_i + b_i)/\sqrt{2a_i}$ ,

$$\begin{aligned} \tilde{g}_i(s) = & \left\{ g(-\sqrt{2a_i}s + \sqrt{2a_i}c_i - b_i)d_i(-\sqrt{2a_i}s + \sqrt{2a_i}c_i - b_i)e^{-2c_i s - c_i^2} I(s \leq 0) \right. \\ & \left. + g(\sqrt{2a_i}s + \sqrt{2a_i}c_i - b_i)d_i(\sqrt{2a_i}s + \sqrt{2a_i}c_i - b_i)e^{2c_i s - c_i^2} I(s > 0) \right\} / 2, \end{aligned}$$

and

$$\tilde{d}_i(s) = \left\{ d_i(-\sqrt{2a_i}s + \sqrt{2a_i}c_i - b_i)e^{-2c_i s - c_i^2} I(s \leq 0) + d_i(\sqrt{2a_i}s + \sqrt{2a_i}c_i - b_i)e^{2c_i s - c_i^2} I(s > 0) \right\} / 2.$$

If  $S_i$  is missing, then we set

$$\hat{E}\{g(S_i)\} = \frac{\sum_{k=1}^K g(\sqrt{2a_i}x_k + b_i)d_i(\sqrt{2a_i}x_k + b_i)w_k}{\sum_{k=1}^K d_i(\sqrt{2a_i}x_k + b_i)w_k}.$$
