# Supplementary material
Source: PubMed Central journal article supplement (PMC7951090)
Supplement: NIHMS1615930-supplement-supp_info.pdf [file NIHMS1615930-supplement-supp_info.pdf]

# Supplementary Figures to A General Framework for Integrative Analysis of Incomplete Multi-omics Data

Dan-Yu Lin, Donglin Zeng, and David Couper

*Department of Biostatistics, University of North Carolina, Chapel Hill, NC 27599-7420*

## Figure Legends

**Figure S1.** Quantile-quantile plots for testing  $\beta = 0$  under the Joint Model when the detection limit is 1.

**Figure S2.** Simulation results under the Joint Model when the biomarker has the  $t$ -distribution with 5 degrees of freedom. The red, black, green, and blue curves pertain to the proposed method, complete-case analysis, imputation at limit, and imputation at mid-point, respectively.

**Figure S3.** Simulation results under the Joint Model when the biomarker is the logarithm of the standard exponential random variable. The red, black, green, and blue curves pertain to the proposed method, complete-case analysis, imputation at limit, and imputation at mid-point, respectively.

**Figure S4.** Simulation results under the Joint Model when the biomarker has the standard normal distribution and the inverse-normal transformation is performed on the observed values. The red, black, green, and blue curves pertain to the proposed method, complete-case analysis, imputation at limit, and imputation at mid-point, respectively.

**Figure S5.** Simulation results under the Joint Model with  $\beta = 0$  when the biomarker has 30% missing values: (A) effect of the SNP genotype on the quantitative omics variable (i.e.,  $\alpha_G$ ); (B) effect of the quantitative omics variable on the phenotype (i.e.,  $\gamma$ ); and (C) effect of the genotype on the phenotype (i.e.,  $\beta_G$ ). The bias and standard error of the

parameter estimator and the power or type I error of the association test are plotted against the detection limit of the quantitative omics variable. The red, black, green, and blue curves pertain to the proposed method, complete-case analysis, imputation at limit, and imputation at mid-point, respectively. The silver curve pertains to the mean of the standard error estimator for the proposed method.

**Figure S6.** Simulation results under the Joint Model with  $\beta = 0.2$  when the biomarker has 30% missing values: (A) effect of the SNP genotype on the quantitative omics variable (i.e.,  $\alpha_G$ ); (B) effect of the quantitative omics variable on the phenotype (i.e.,  $\gamma$ ); and (C) effect of the genotype on the phenotype (i.e.,  $\beta$ ). The bias and standard error of the parameter estimator and the power of the association test are plotted against the lower detection limit of the quantitative omics variable. The red, black, green, and blue curves pertain to the proposed method, complete-case analysis, imputation at limit, and imputation at mid-point, respectively. The silver curve pertains to the mean of the standard error estimator for the proposed method.

**Figure S7.** Simulation results under the Joint Model with  $\beta = 0.2$  when there are two SNPs in the model: (A) effect of the SNP with MAF of 0.4 on the quantitative omics variable (i.e.,  $\alpha_G$ ); (B) effect of the quantitative omics variable on the phenotype (i.e.,  $\gamma$ ); and (C) effect of the SNP with MAF of 0.4 on the phenotype (i.e.,  $\beta$ ). The bias and standard error of the parameter estimator and the power of the association test are plotted against the lower detection limit of the quantitative omics variable. The red, black, green, and blue curves pertain to the proposed method, complete-case analysis, imputation at limit, and imputation at mid-point, respectively. The silver curve pertains to the mean of the standard error estimator for the proposed method.

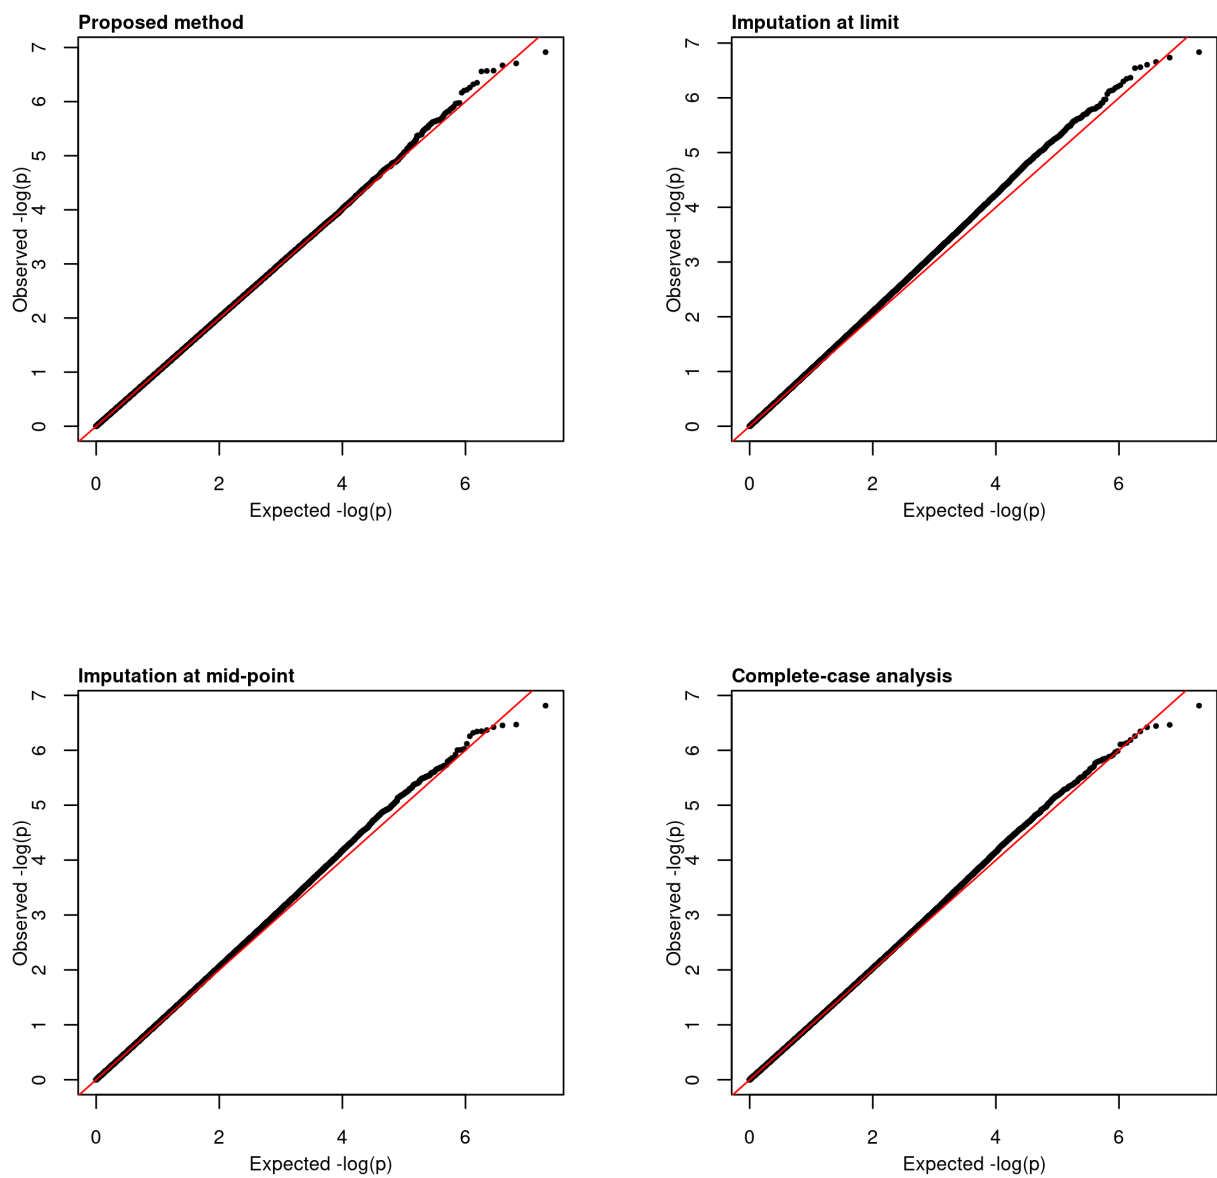

Figure S1

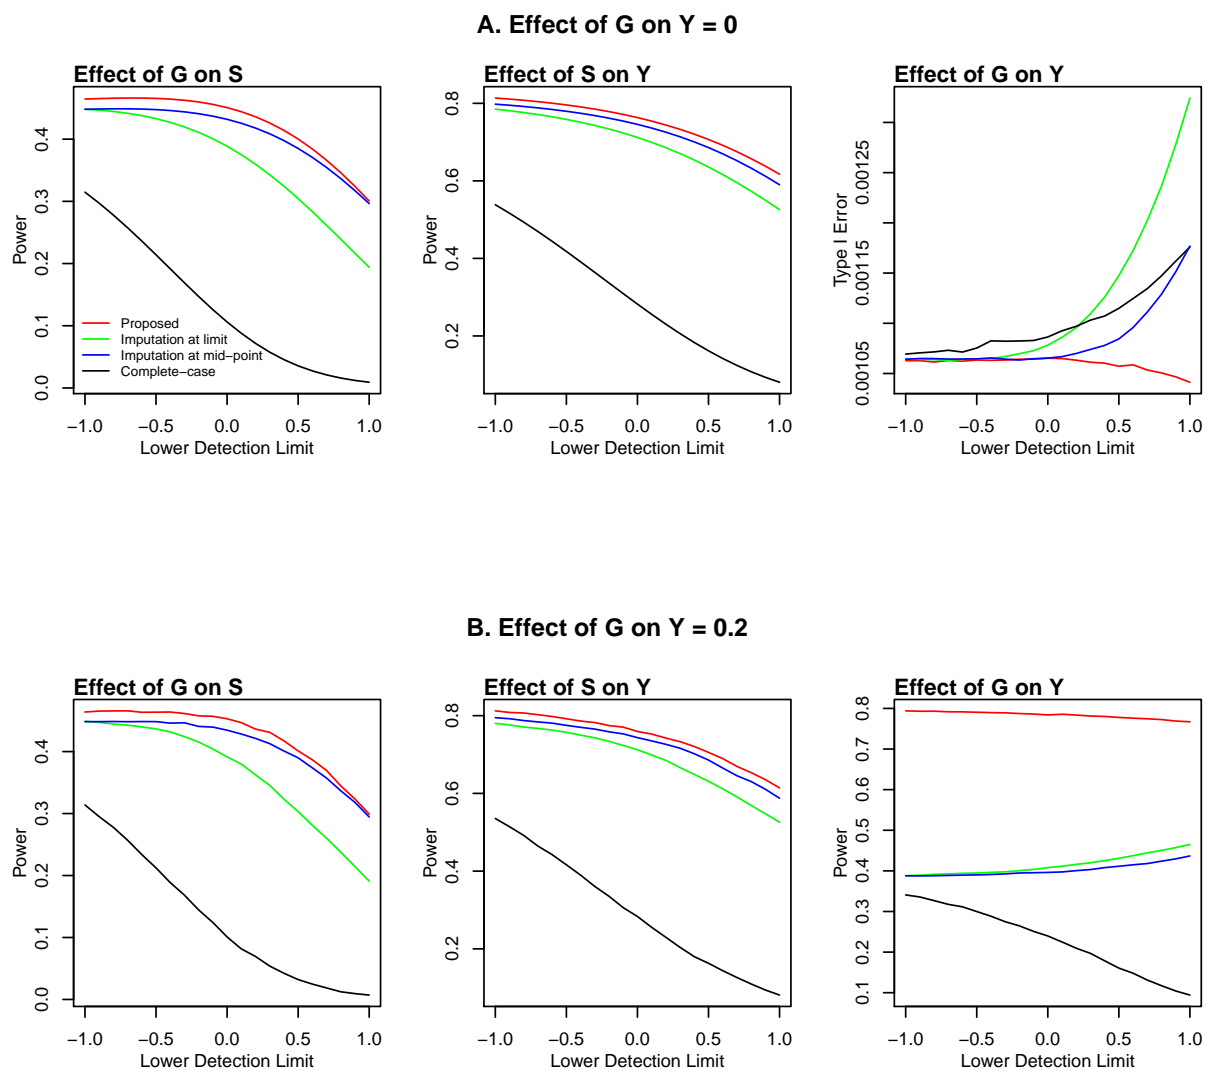

Figure S2

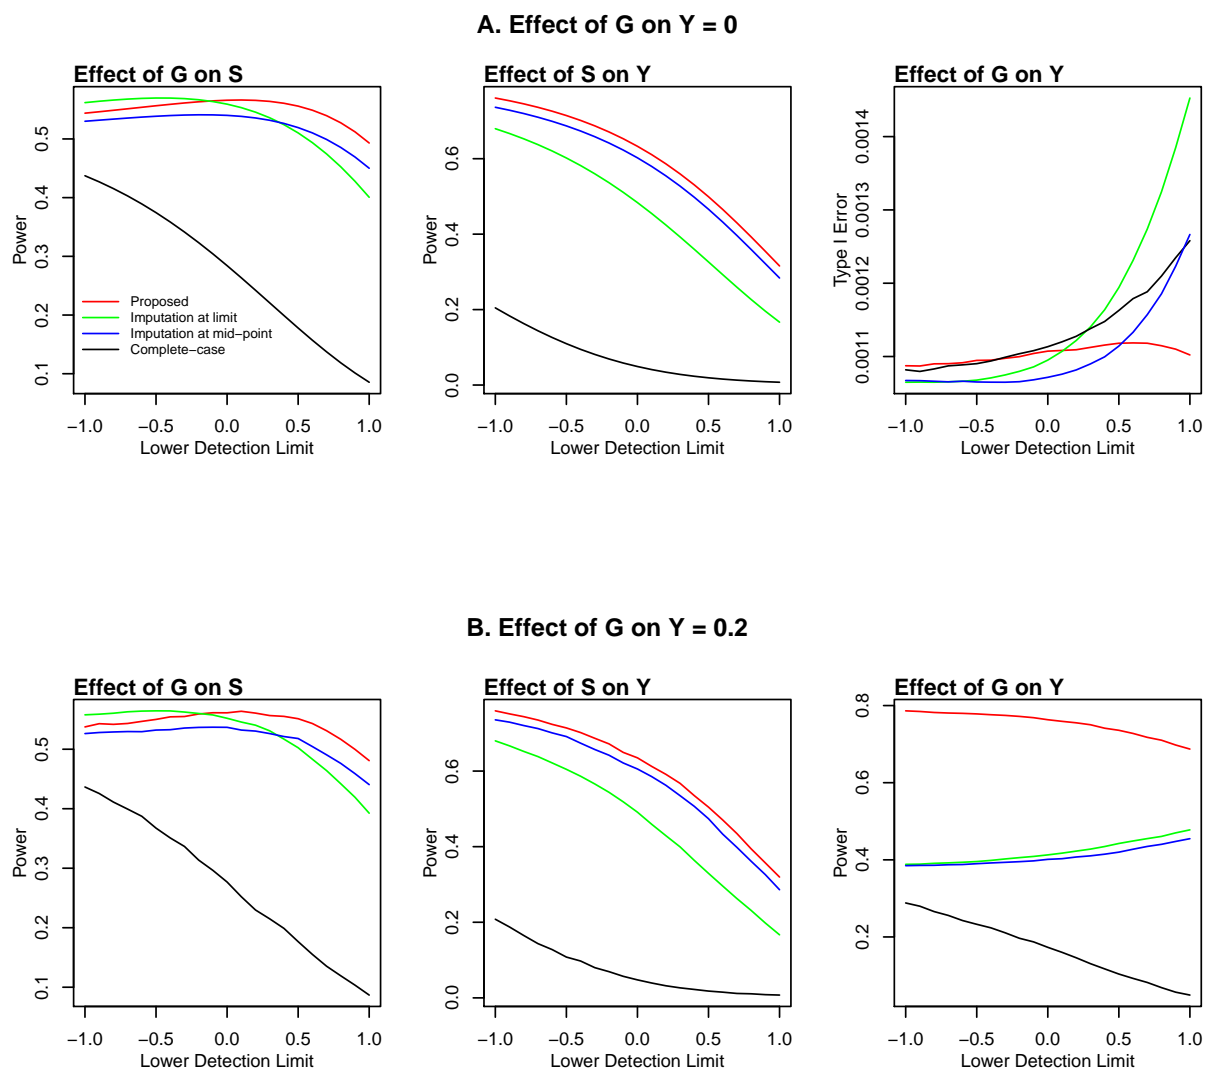

**Figure S3**

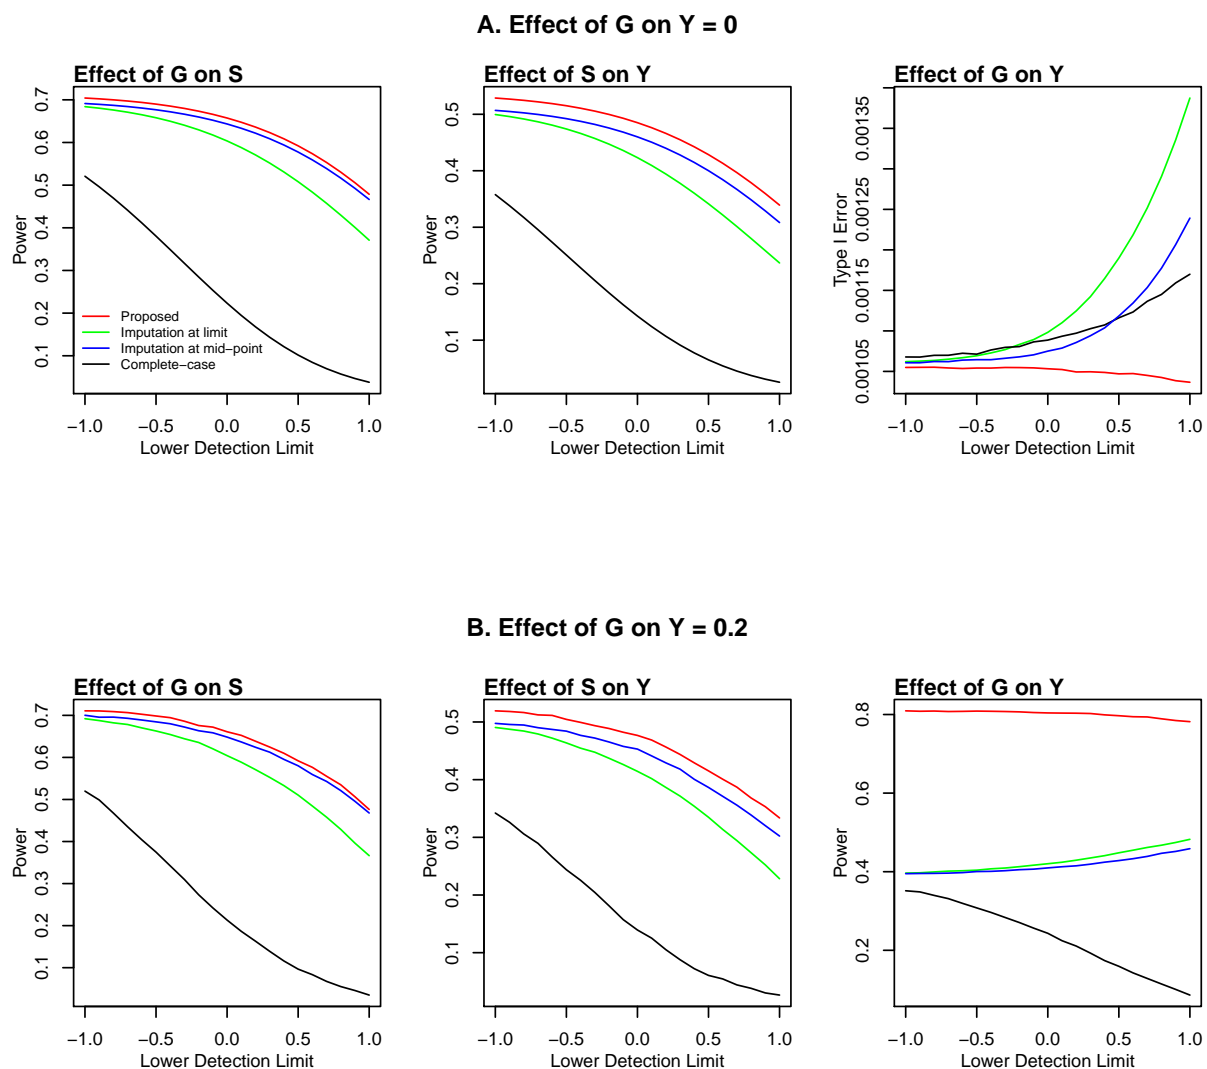

Figure S4

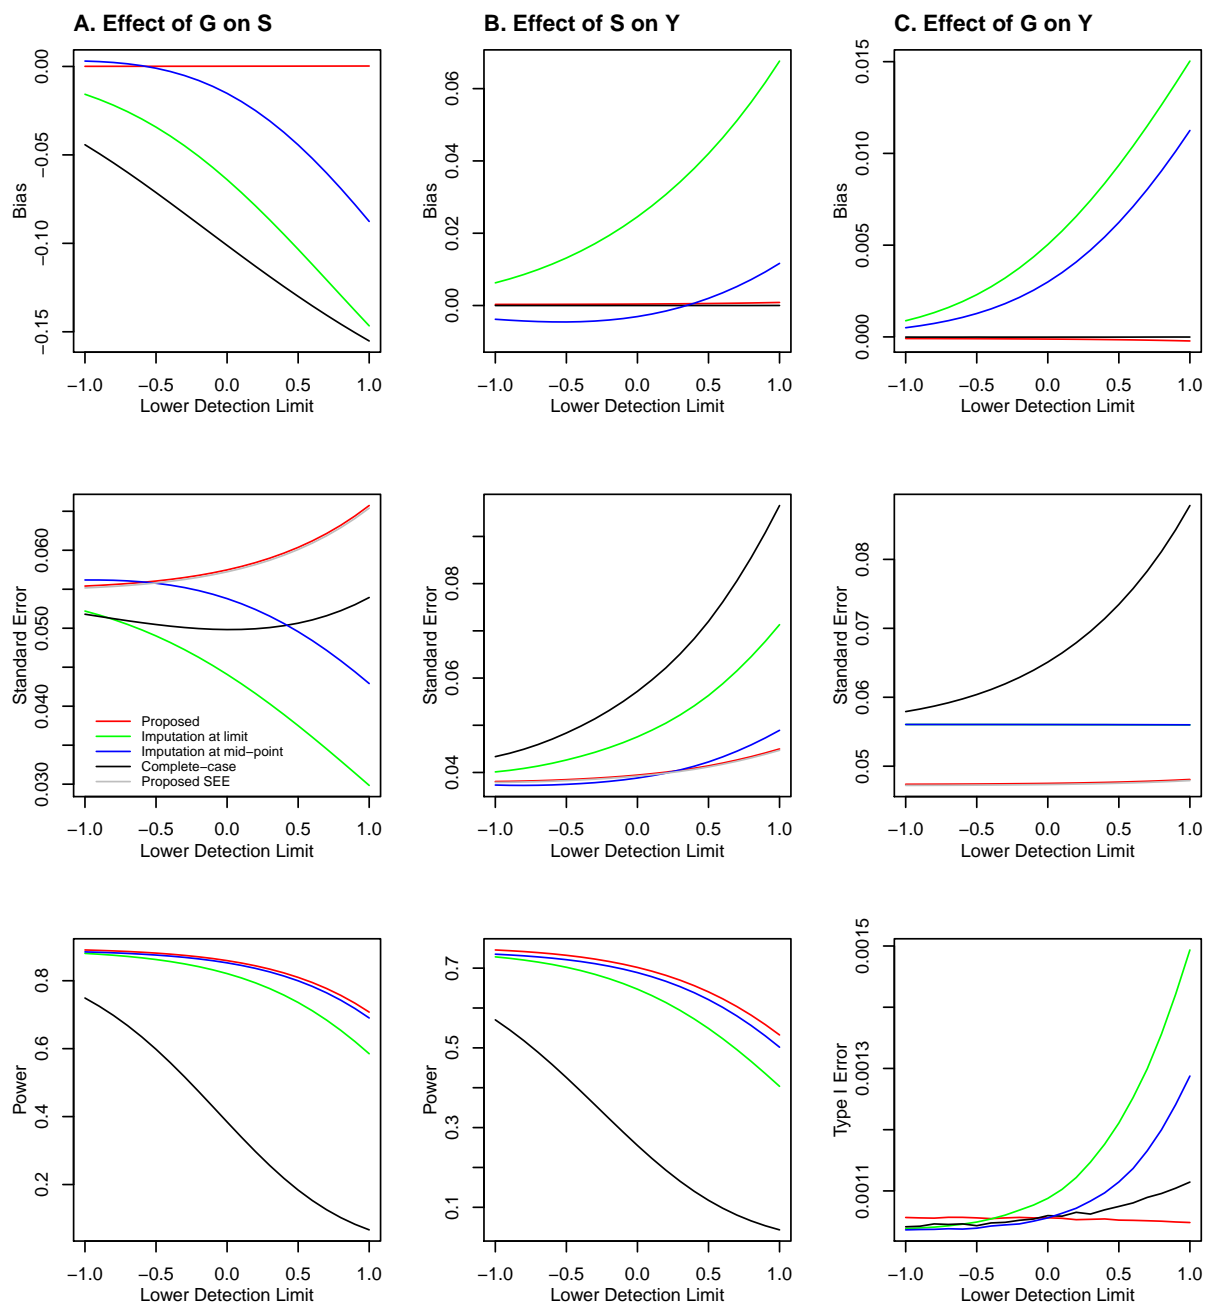

Figure S5

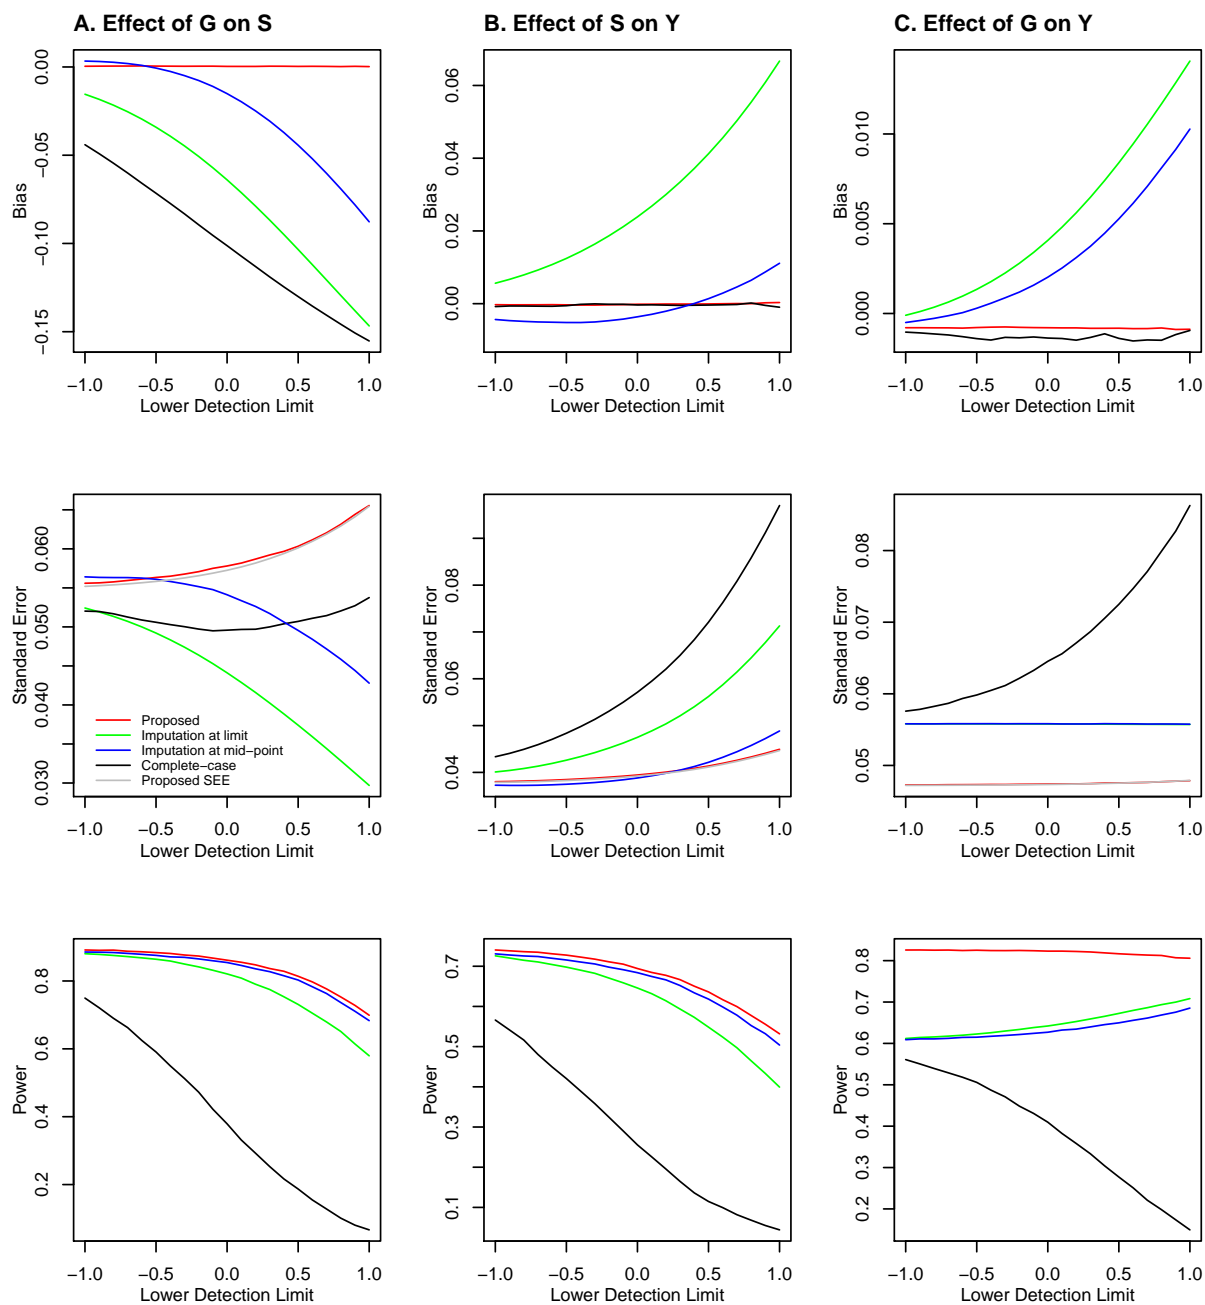

Figure S6

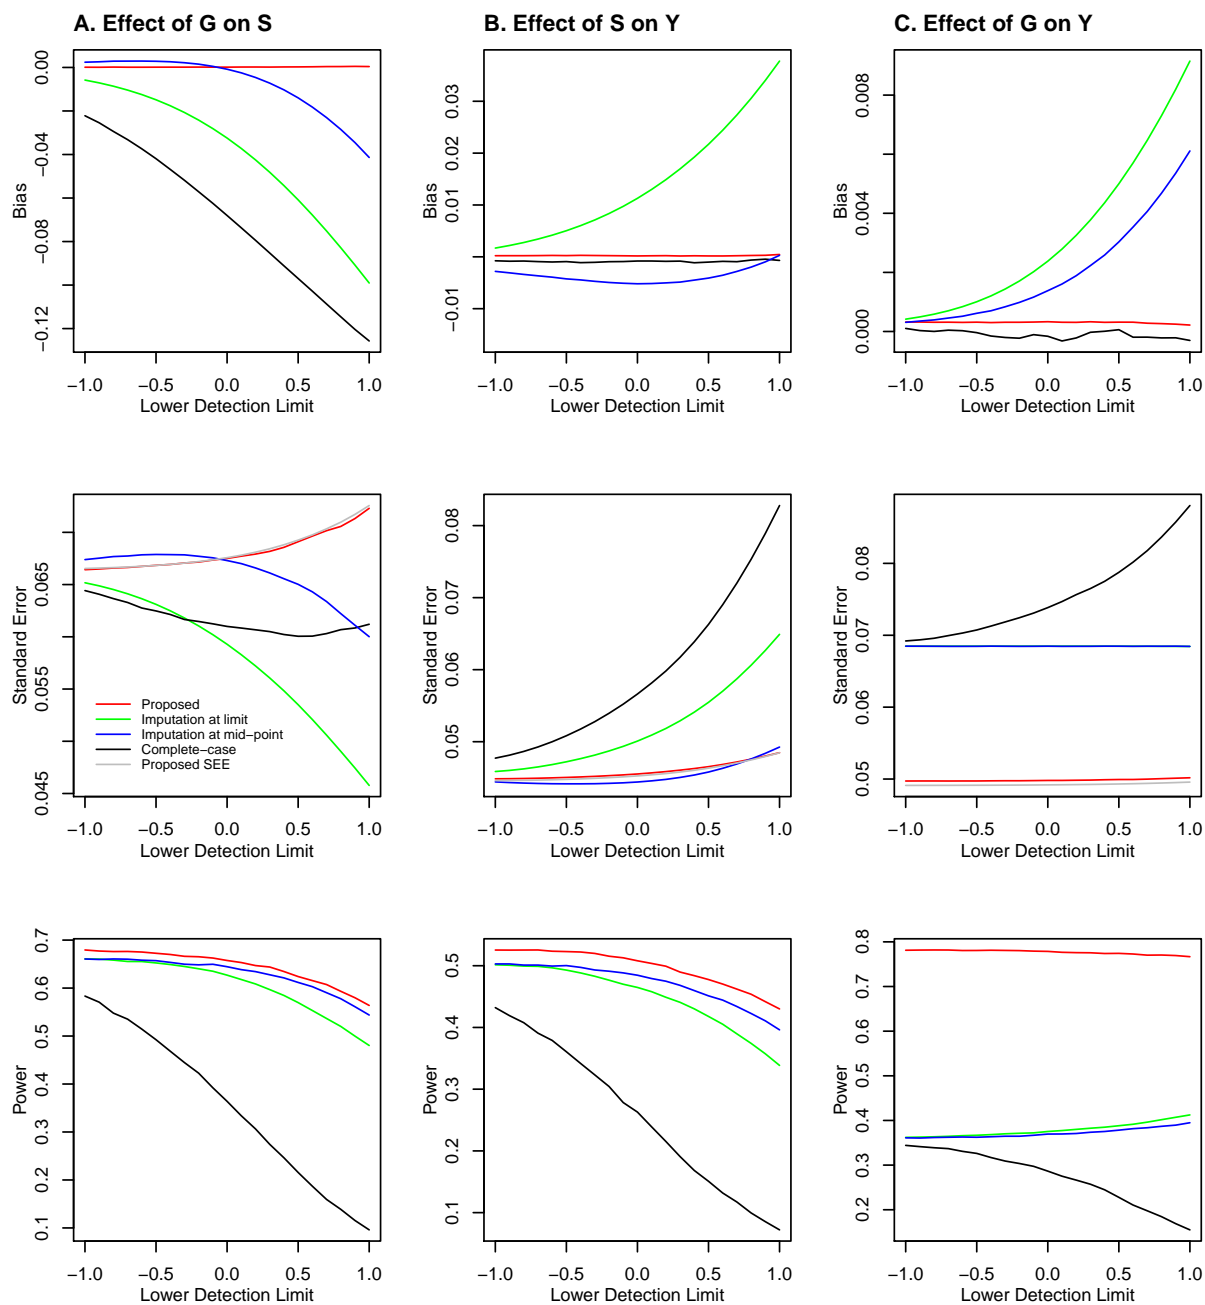

Figure S7
